# Supplementary material for: Role of functionalized self-assembled peptide hydrogels in in vitro vasculogenesis
Source: Royal Society of Chemistry journal article supplement (doi:10.1039/d1sm00680k), 2021-01-01
Supplement: d1sm00680k1.pdf [file d1sm00680k1.pdf]

### Supporting Information For

## Role of Functionalized Self-Assembled Peptide Hydrogel on In Vitro Vasculogenesis

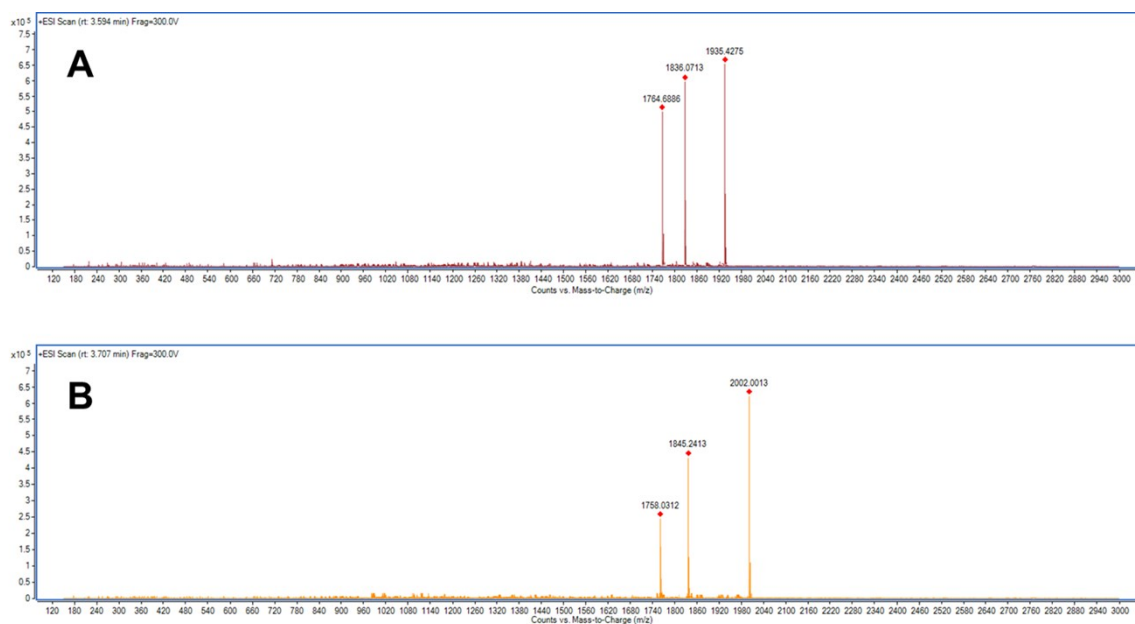

**Figure S1.** Ionization mass spectra of A) KLD-V1, and B) KLD-V2

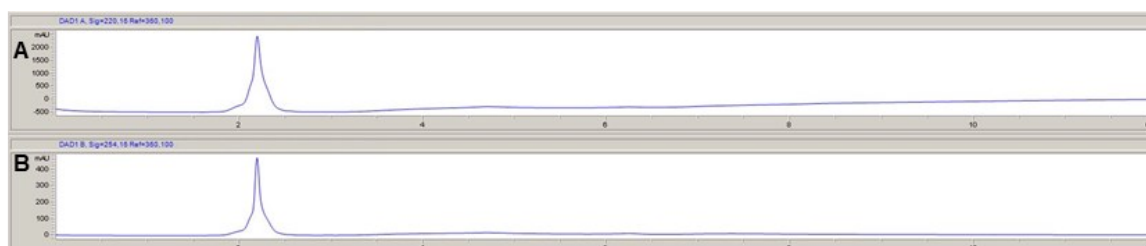

**Figure S2.** Liquid chromatography spectra of A) KLD-V1, and B) KLD-V2

**Supplementary Table S1.** Sequences, observed and calculated molecular weight of synthesized peptides

| Name   | Sequence           | Calculated | Observed |
|--------|--------------------|------------|----------|
| KLD-V1 | KLDLKLDLKLDL-IKVAV | 1936,45    | 1935,42  |
| KLD-V2 | KLDLKLDLKLDL-YIGSR | 2002,43    | 2002,00  |
